# Supplementary material for: Metal–organic frameworks based on tri- and penta-nuclear manganese(ii) secondary building units self-assembled by a V-shaped silicon-containing dicarboxylate
Source: Royal Society of Chemistry journal article supplement (doi:10.1039/c6ra03969c), 2016-01-01
Supplement: c6ra03969c1.pdf [file c6ra03969c1.pdf]

Supplementary information for:

*Metal-Organic Frameworks Based on Tri- and Penta-nuclear Manganese(II) Secondary Building Units Self-assembled by a V-Shaped Silicon-containing Dicarboxylate*

Angelica Vlad, Mirela-Fernanda Zaltariov, Sergiu Shova, Ghenadie Novitchi, Cyrille Train, Maria Cazacu

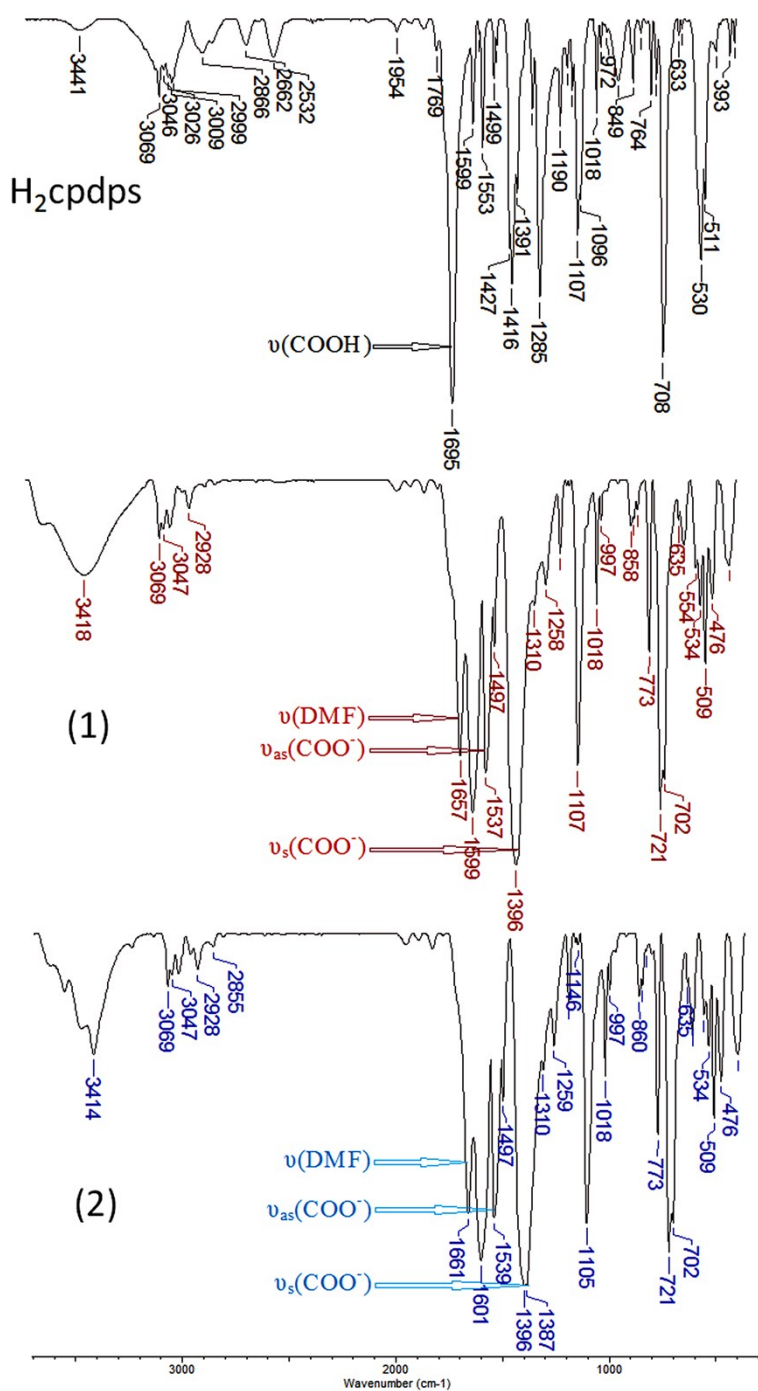

**Figure S1.** Comparative FTIR spectra of the carboxylic acid (H<sub>2</sub>cpdps) and manganese(II) complexes **1** and **2**.

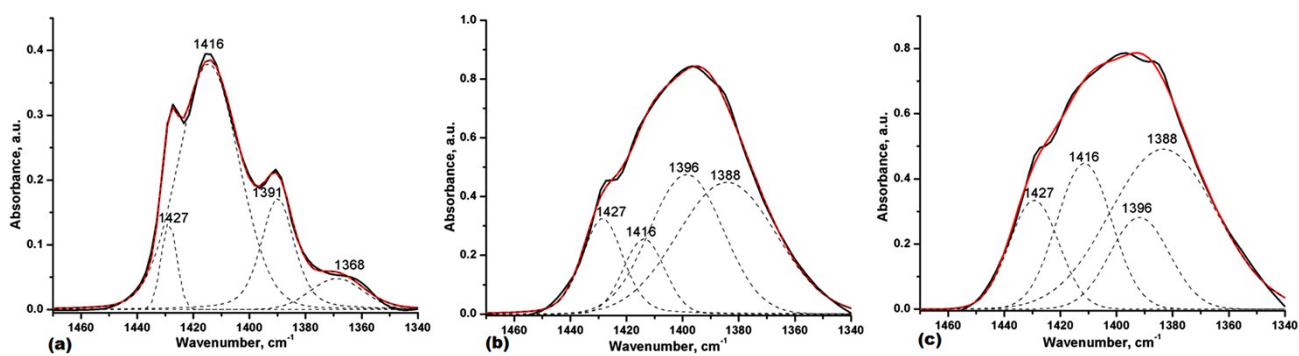

**Figure S2.** Deconvoluted FTIR spectra in the range 1470-1340 cm<sup>-1</sup> for H<sub>2</sub>cpdps – (a) and manganese(II) complexes **1** – (b) and **2** – (c).

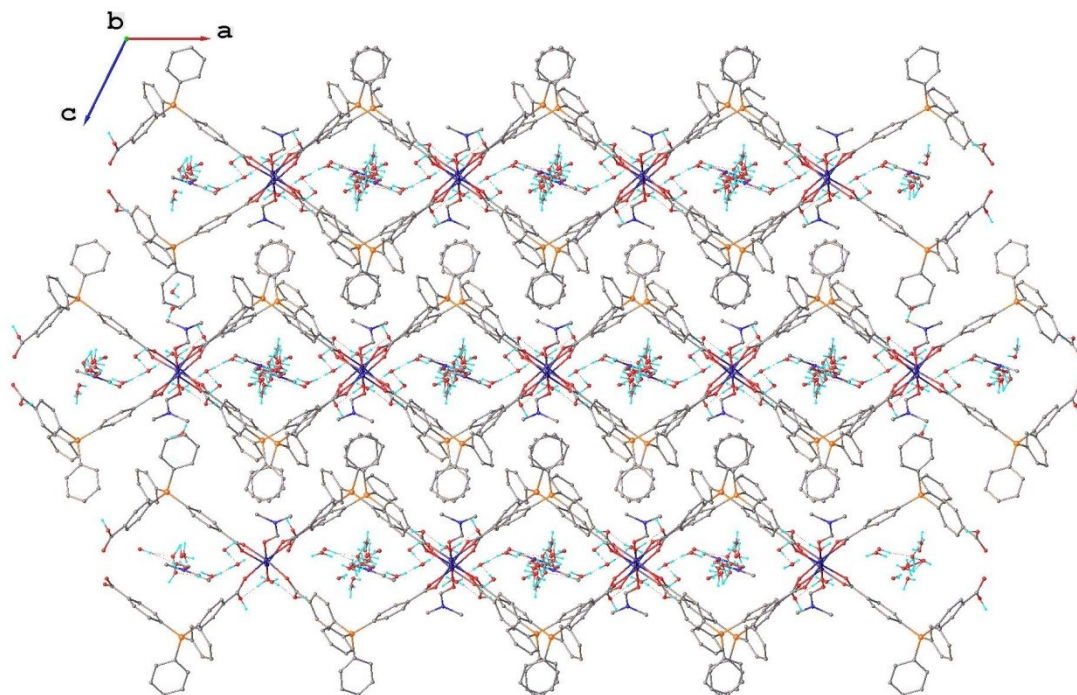

**Figure S3.** Crystal structure packing of **1** viewed along *b* axis. Non-relevant h-atoms are omitted for clarity.

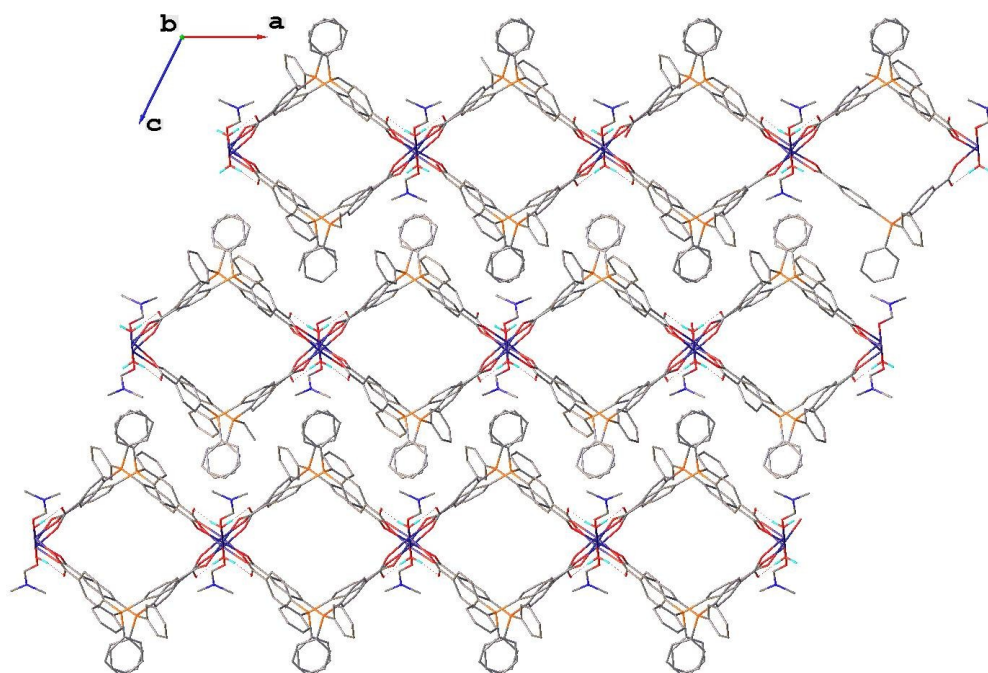

**Figure S4.** View of the crystal structure of **2** along the crystallographic axis *b*. H-atoms and solvate molecules are omitted for clarity.

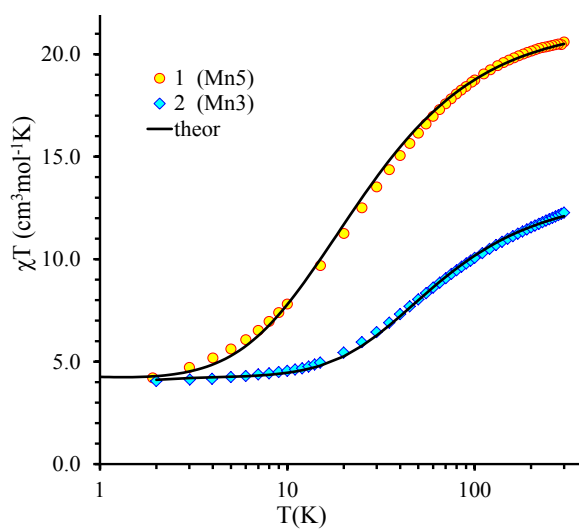

**Figure S5.**  $\chi T$  versus  $T$  plots in logarithmic scale for **1** and **2**. The solid lines correspond to the simulation according the Hamiltonians (eq. 1 and 2) with parameters described in the main text.

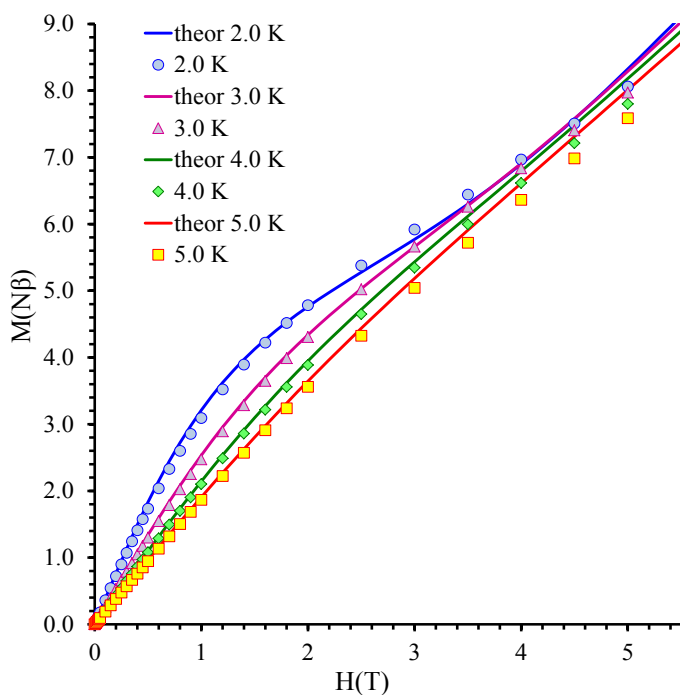

**Figure S6.** Field dependence of magnetization for **1** at 2.0, 3.0, 4.0 and 5.0 K. The solid lines correspond to the simulation according to the Hamiltonians given in eq. (1 main text ) with  $J_a = -0.65 \text{ cm}^{-1}$ ;  $J_b = -1.3 \text{ cm}^{-1}$ ;  $g = 1.98$ .

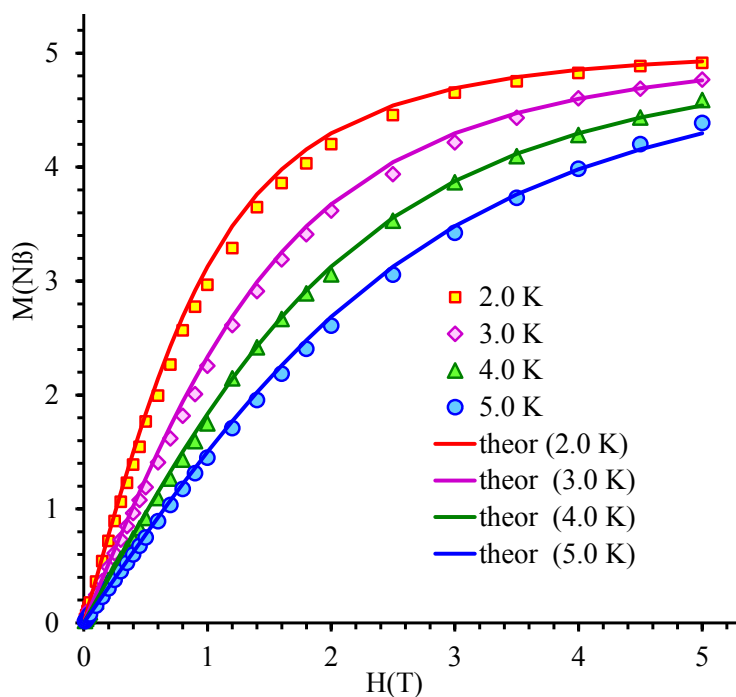

**Figure S7.** Simultaneous field dependence of magnetization for **2** at temperature indicated in legend. The solid lines correspond to simulation according the Brillouin function with  $S=5/2$ ;  $g = 2.0$

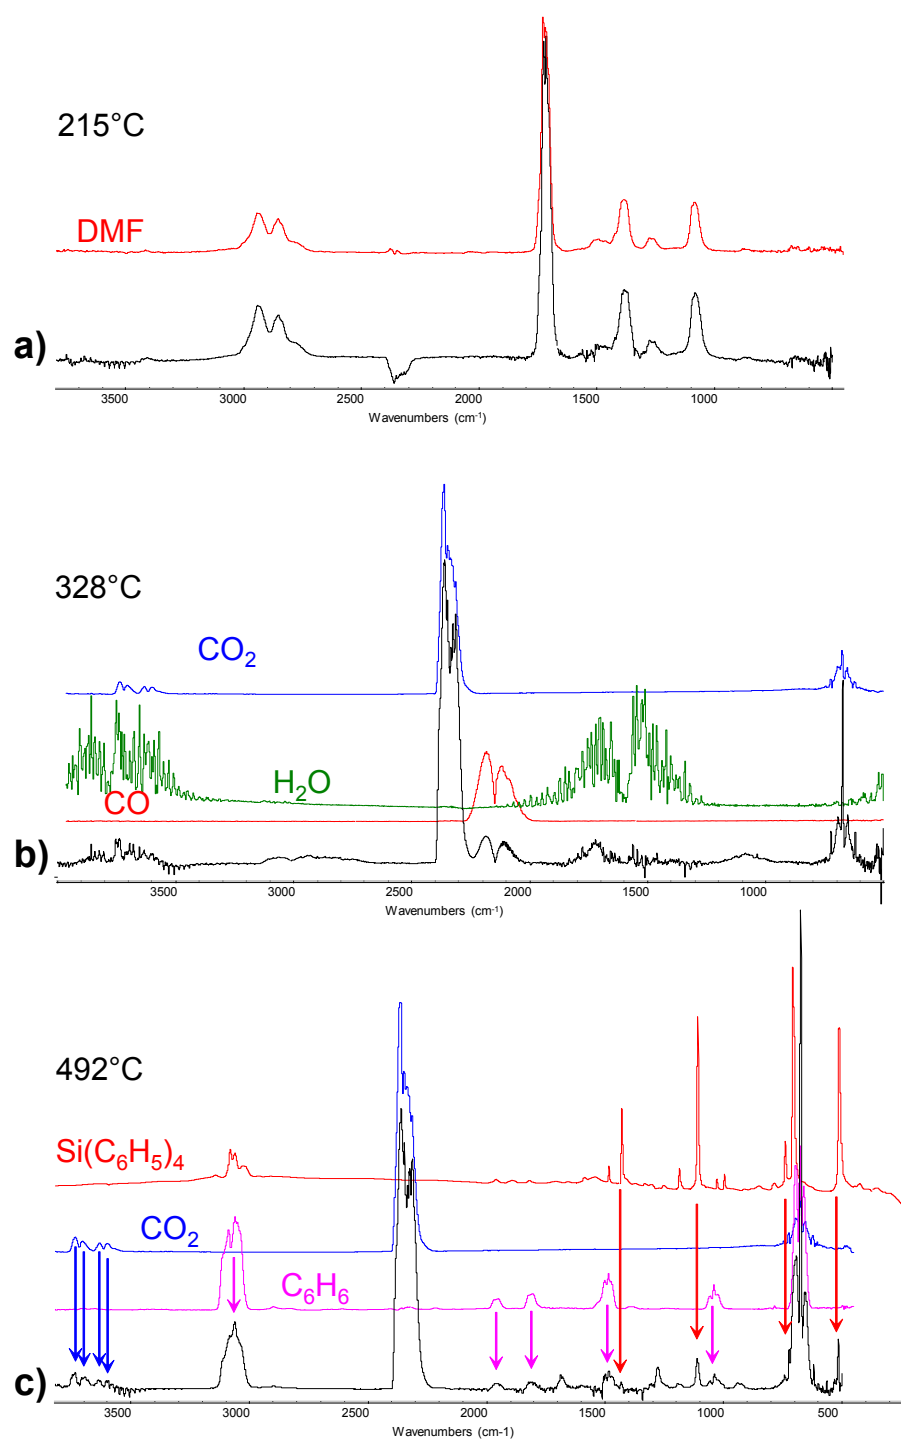

**Figure S8.** FTIR spectra of the gases evolved during the heating of **2** and comparison with model compounds spectra.

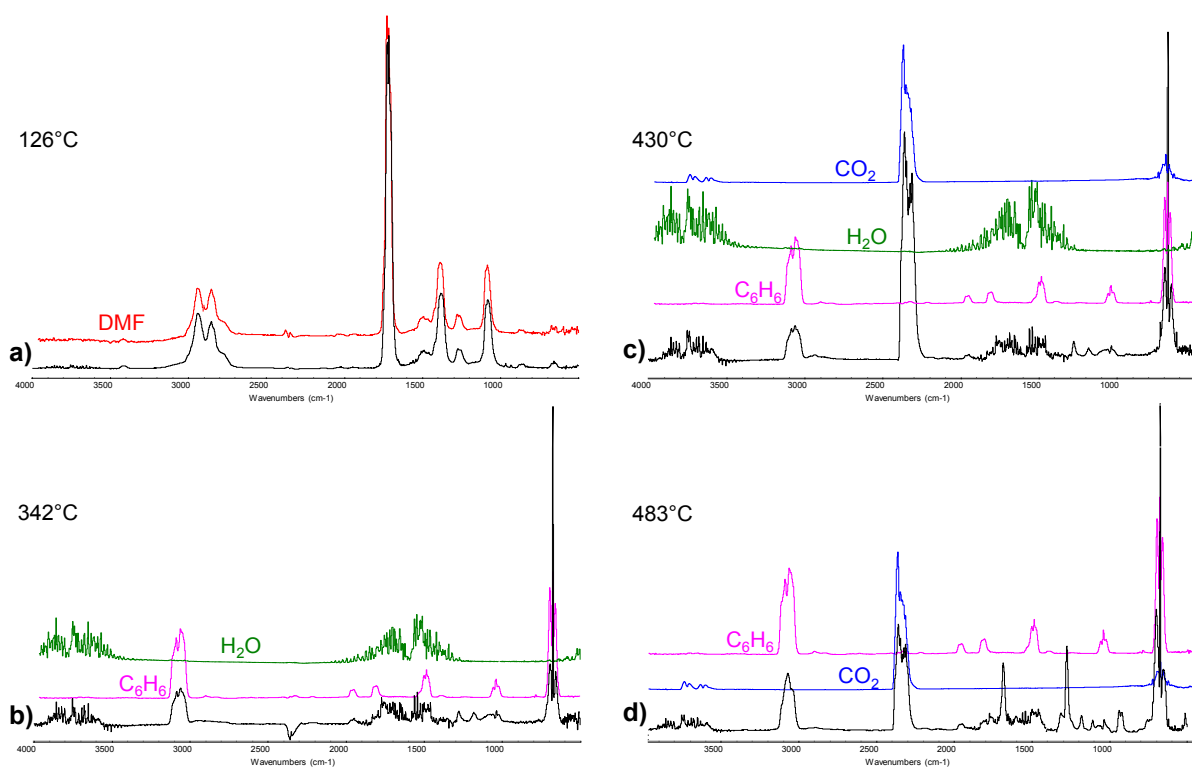

**Figure S9.** Selected FTIR spectra of the gases evolved during the heating of **1** at indicated temperature.

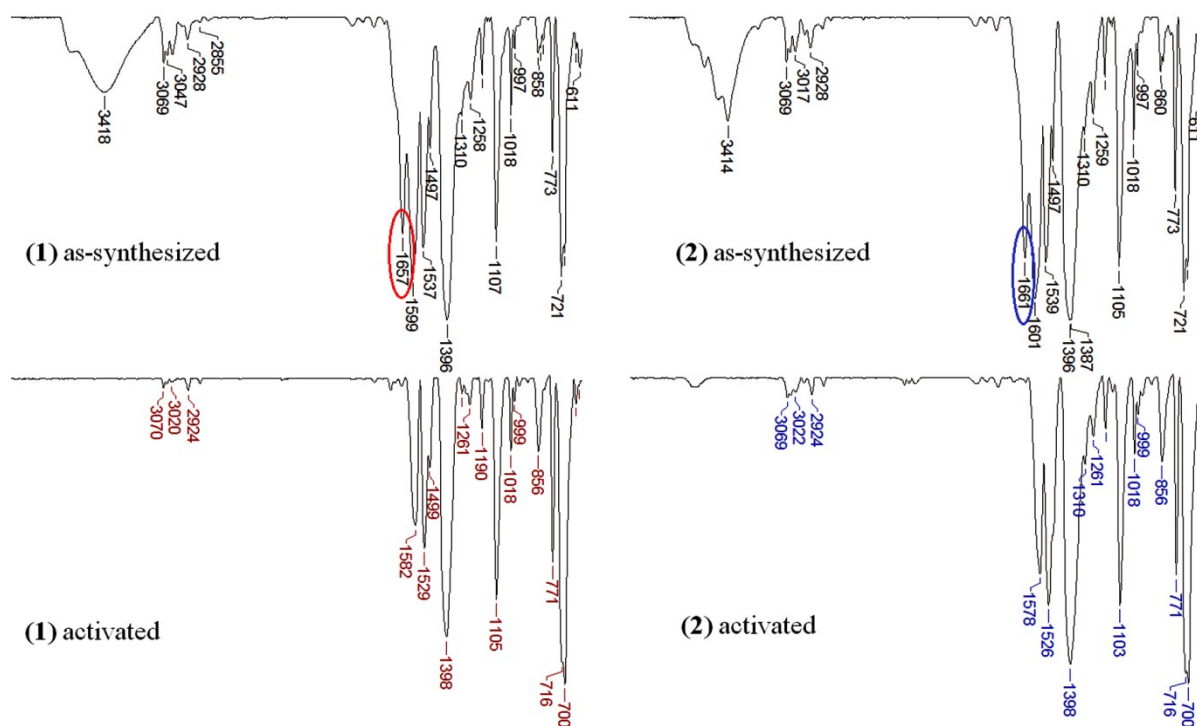

**Figure S10.** IR spectra of compounds **1** and **2** before and after heating activation.

**Table S1.** Theoretically estimated void volume values of the crystalline compounds accessible to different guests molecules after removal of disordered crystallization solvents by activation process

| <b>Guest compound (R, Å)</b> | <b>Contact surface area</b>  |          |                                    |          | <b>Solvent accessible surface</b> |          |                                    |          |
|------------------------------|------------------------------|----------|------------------------------------|----------|-----------------------------------|----------|------------------------------------|----------|
|                              | <b>% of unit cell volume</b> |          | <b>Void volume (Å<sup>3</sup>)</b> |          | <b>% of unit cell volume</b>      |          | <b>Void volume (Å<sup>3</sup>)</b> |          |
|                              | <b>1</b>                     | <b>2</b> | <b>1</b>                           | <b>2</b> | <b>1</b>                          | <b>2</b> | <b>1</b>                           | <b>2</b> |
| <b>Compound</b>              |                              |          |                                    |          |                                   |          |                                    |          |
| N <sub>2</sub> (0.750)       | 35.7                         | 36.4     | 1275.17                            | 4654.59  | 18.0                              | 19.5     | 642.67                             | 2497.89  |
| Ar (0.940)                   | 31.1                         | 31.8     | 1110.83                            | 4063.19  | 12.8                              | 14.6     | 457.43                             | 1868.18  |
| CO <sub>2</sub> (1.935)      | 17.9                         | 19.2     | 640.97                             | 2454.79  | 1.6                               | 1.9      | 57.04                              | 243.03   |
